# Supplementary material for: Bio-Mimicking Acellular Wet Electrospun Scaffolds Promote Accelerated Integration and Re-Epithelialization of Full-Thickness Dermal Wounds
Source: MDPI journal article supplement (doi:10.3390/bioengineering9070324), 2022-07-18
Supplement: s1 [file s1]

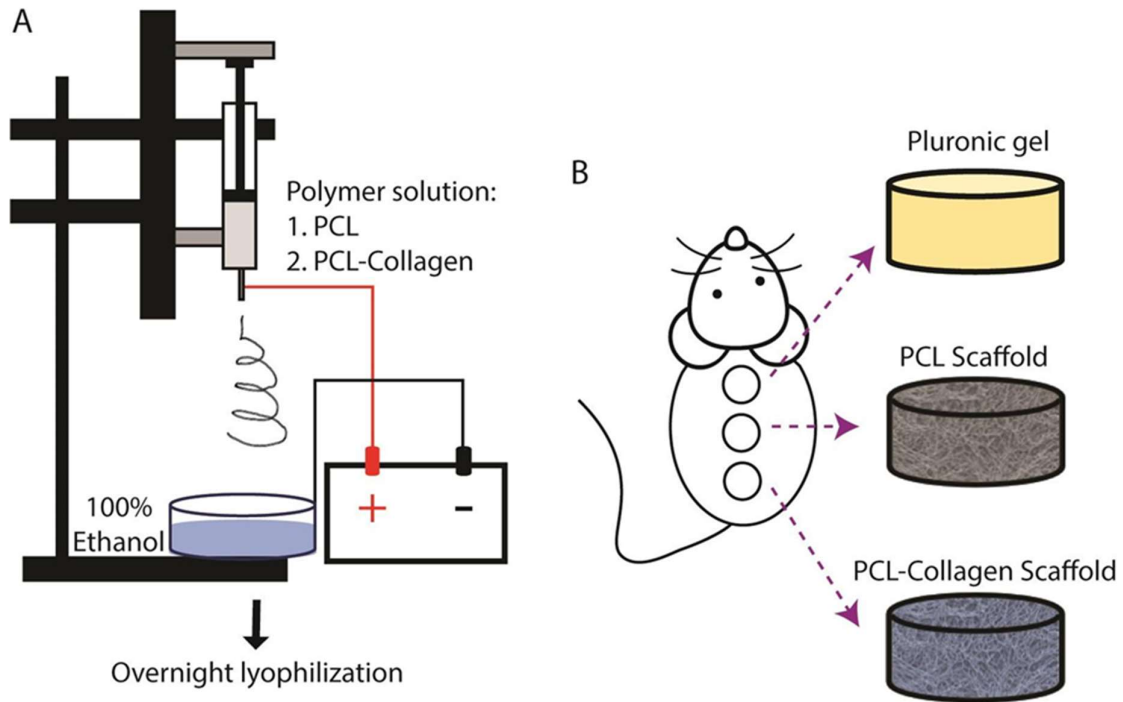

**Supplementary Figure S1.** (A) Schematic of wet electrospinning setup. (B) Types of scaffold implanted into the wounds on the back of the rat. Placement of scaffolds and Pluronic gel were randomised from rat to rat.
